# Supplementary material
Source: PubMed Central journal article supplement (PMC2651296)
Supplement: 0810728106_0810728106SI.pdf [file 0810728106_0810728106SI.pdf]

# Supporting Information

Lembong et al. 10.1073/pnas.0810728106

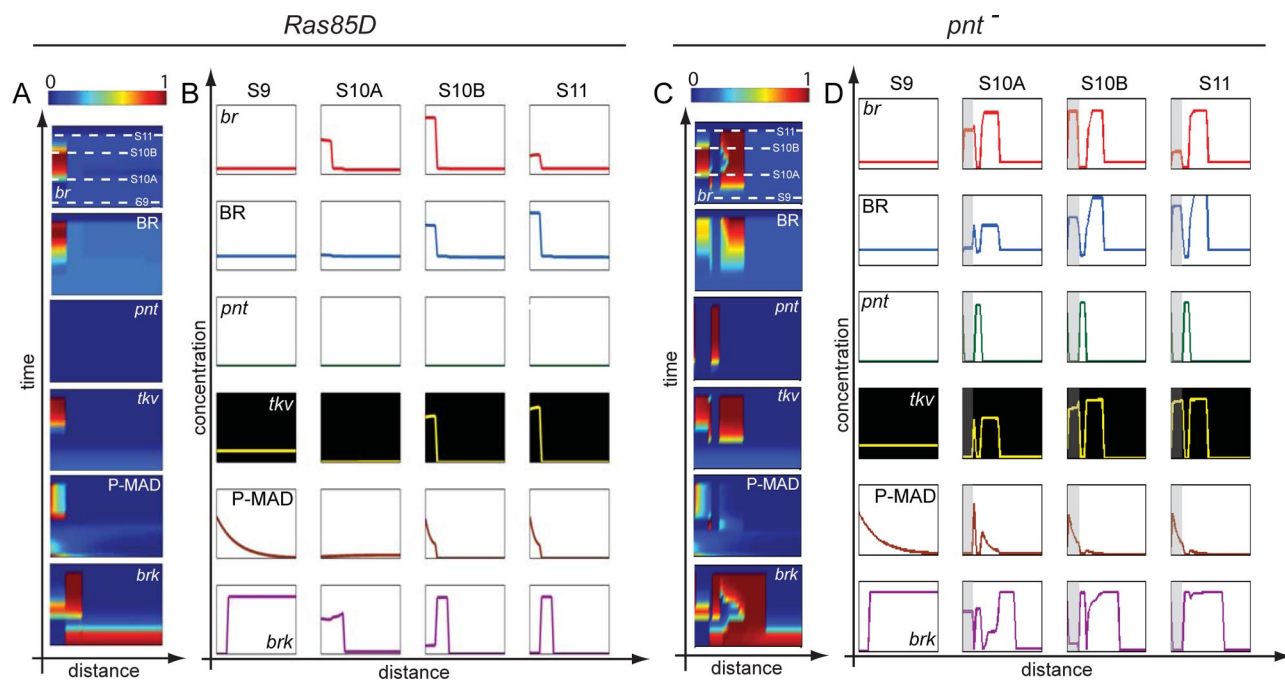

**Fig. S1.** Detailed modeling results in mutant backgrounds. (A and C) Simulation results for all of the network components in the Ras hypomorph and *pnt<sup>-</sup>* clone backgrounds as shown by the color plots of the concentration of each component as a function of space and time. The concentrations are normalized so that their values range from 0 to 1. (B and D) The corresponding predicted concentration profiles of each of the network components in the Ras hypomorph and *pnt<sup>-</sup>* clone backgrounds. Gray boxes mark the locations of the *pnt<sup>-</sup>* clones.





Table S2. Summary of the model's parameters

| No. | Symbol                   | Description                                                                            |
|-----|--------------------------|----------------------------------------------------------------------------------------|
| 1   | $D_{GRK}$                | Diffusivity of GRK                                                                     |
| 2   | $D_{DPP}$                | Diffusivity of DPP                                                                     |
| 3   | $k_{on,GRK}$             | GRK-EGFR binding constant                                                              |
| 4   | $k_{off,GRK}$            | GRK-EGFR unbinding constant                                                            |
| 5   | $k_{e,GRK}$              | GRK-EGFR complex endocytosis/degradation rate constant                                 |
| 6   | $k_{on,DPP}$             | DPP-TKV binding constant                                                               |
| 7   | $k_{off,DPP}$            | DPP-TKV unbinding constant                                                             |
| 8   | $k_{e,DPP}$              | DPP-TKV complex endocytosis rate constant                                              |
| 9   | $k_{d,PNT}$              | Degradation rate constant of PNT                                                       |
| 10  | $k_{d,br}$               | Degradation rate constant of <i>br</i>                                                 |
| 11  | $k_{d,BR}$               | Degradation rate constant of BR                                                        |
| 12  | $k_{d,TKV}$              | Ligand independent degradation rate constant of TKV                                    |
| 13  | $k_{d,BRK}$              | Degradation rate constant of BRK                                                       |
| 14  | $k_{d,C_{DPP-TKV}}$      | Degradation rate constant of internalized DPP-TKV complex                              |
| 15  | $V_{GRK}$                | Rate of production of GRK                                                              |
| 16  | $V_{DPP}$                | Rate of production of DPP                                                              |
| 17  | $\theta_{[SEGR], [PNT]}$ | Threshold of EGFR signaling above which PNT is activated                               |
| 18  | $\theta_{[SEGR], [br]}$  | Threshold of EGFR signaling above which <i>br</i> is activated                         |
| 19  | $\theta_{[SEGR], [BRK]}$ | Threshold of EGFR signaling above which BRK is activated                               |
| 20  | $\theta_{[PNT], [br]}$   | Threshold of PNT concentration above which <i>br</i> is repressed                      |
| 21  | $\theta_{[BR], [TKV]}$   | Threshold of BR concentration above which TKV is activated                             |
| 22  | $\theta_{[SDPP], [BRK]}$ | Threshold of DPP signaling above which BRK is repressed                                |
| 23  | $\theta_{[SDPP], [br]}$  | Threshold of DPP signaling above which <i>br</i> is repressed                          |
| 24  | $\theta_{[BRK], [br]}$   | Threshold of BRK concentration above which P-MAD repression on <i>br</i> is eliminated |
| 25  | $\gamma_{br}$            | <i>br</i> production rate constant                                                     |
| 26  | $\gamma_{PNT}$           | PNT production rate constant                                                           |
| 27  | $\gamma_{TKV}$           | TKV production rate constant                                                           |
| 28  | $\gamma_{BRK}$           | BRK production rate constant                                                           |
| 29  | $\gamma_{BR}$            | BR translation rate constant                                                           |
| 30  | $L$                      | Length of the quasi-one-dimensional subsystem                                          |
| 31  | $f_{br, g, i}$           | GRK independent production rate of <i>br</i>                                           |
| 32  | $\alpha_{EGFR}$          | Signal transduction constant for EGFR signaling                                        |
| 33  | $\alpha_{DPP}$           | Signal transduction constant for DPP signaling                                         |
| 34  | $X_{GRK}$                | Lateral boundary of GRK source                                                         |
| 35  | $\alpha_{br}$            | Uniform concentration of <i>br</i> at the beginning of stage 9                         |
| 36  | $\alpha_{TKV}$           | Uniform concentration of TKV at the beginning of stage 9                               |
| 37  | $\alpha_{BRK}$           | Uniform concentration of BRK at the beginning of stage 9                               |



Table S4. Summary of the model's parameter groups

| No. | Parameter group         | Definition                                                                                                                                    |
|-----|-------------------------|-----------------------------------------------------------------------------------------------------------------------------------------------|
| 1   | $\varepsilon_{PNT}$     | $k_{d,br} / k_{d,PNT}$                                                                                                                        |
| 2   | $\varepsilon_{TKV}$     | $k_{d,br} / k_{d,TKV}$                                                                                                                        |
| 3   | $\varepsilon_{BRK}$     | $k_{d,br} / k_{d,BRK}$                                                                                                                        |
| 4   | $\varepsilon_{BR}$      | $k_{d,br} / k_{d,BR}$                                                                                                                         |
| 5   | $\varepsilon_{GRK}$     | $L^2 \cdot k_{d,br} / D_{GRK}$                                                                                                                |
| 6   | $\varepsilon_{DPP}$     | $L^2 \cdot k_{d,br} / D_{DPP}$                                                                                                                |
| 7   | $K_{e,GRK}$             | $k_{e,GRK} \cdot k_{on,GRK} / (k_{off,GRK} + k_{e,GRK})$                                                                                      |
| 8   | $K_{e,DPP}$             | $k_{e,DPP} \cdot k_{on,DPP} / (k_{off,DPP} + k_{e,DPP})$                                                                                      |
| 9   | $k_{d,GRK}$             | $K_{d,GRK} \cdot [EGFR]$                                                                                                                      |
| 10  | $k_{d,DPP}$             | $K_{d,DPP} \cdot TkV_0$                                                                                                                       |
| 11  | $\kappa_{d,DPP}$        | $K_{d,DPP} \cdot V_{DPP} \cdot L / D_{DPP} \cdot k_{TKV}$                                                                                     |
| 12  | $\varphi_{DPP}^2$       | $L^2 \cdot k_{on,DPP} \cdot k_{e,DPP} \cdot TKV_0 / (D_{DPP} \cdot (k_{off,DPP} + k_{e,DPP}))$                                                |
| 13  | $\varphi_{GRK}^2$       | $L^2 \cdot k_{on,GRK} \cdot k_{e,GRK} \cdot [EGFR] / (D_{GRK} \cdot (k_{off,GRK} + k_{e,GRK}))$                                               |
| 14  | $br$                    | $[br] / (\gamma_{br} / k_{d,br})$                                                                                                             |
| 15  | $PNT$                   | $[PNT] / (\gamma_{PNT} / k_{d,PNT})$                                                                                                          |
| 16  | $TKV$                   | $[TKV] / (\gamma_{TKV} / k_{d,TKV})$                                                                                                          |
| 17  | $BRK$                   | $[BRK] / (\gamma_{BRK} / k_{d,BRK})$                                                                                                          |
| 18  | $BR$                    | $[BR] / (\gamma_{BR} \cdot k_{d,BR} \cdot \gamma_{br} / k_{d,br})$                                                                            |
| 19  | $GRK$                   | $[GRK] / (V_{GRK} / k_{d,GRK})$                                                                                                               |
| 20  | $DPP$                   | $[DPP] / (V_{DPP} \cdot L / D_{DPP})$                                                                                                         |
| 21  | $\alpha'_{EGFR}$        | $(1 / S_{EGFR}(S9, x = 0)) \cdot \alpha_{EGFR}$                                                                                               |
| 22  | $\alpha'_{DPP}$         | $(1 / S_{DPP}(S9, x = 0)) \cdot \alpha_{DPP}$                                                                                                 |
| 23  | $\theta_{S_{EGFR},PNT}$ | $\theta_{[S_{EGFR}], [PNT]} / (V_{GRK} / k_{d,GRK})$                                                                                          |
| 24  | $\theta_{S_{EGFR},br}$  | $\theta_{[S_{EGFR}], [br]} / (V_{GRK} / k_{d,GRK})$                                                                                           |
| 25  | $\theta_{S_{EGFR},BRK}$ | $\theta_{[S_{EGFR}], [BRK]} / (V_{GRK} / k_{d,GRK})$                                                                                          |
| 26  | $\theta_{S_{DPP},br}$   | $\theta_{[S_{DPP}], [br]} / \left( k_{e,DPP} \cdot k_{d,DPP} \cdot V_{DPP} \cdot L / \left( k_{d,C_{DPP-TKV}} \cdot D_{DPP} \right) \right)$  |
| 27  | $\theta_{S_{DPP},BRK}$  | $\theta_{[S_{DPP}], [BRK]} / \left( k_{e,DPP} \cdot k_{d,DPP} \cdot V_{DPP} \cdot L / \left( k_{d,C_{DPP-TKV}} \cdot D_{DPP} \right) \right)$ |
| 28  | $\theta_{PNT,br}$       | $\theta_{[PNT], [br]} / (\gamma_{PNT} / k_{d,PNT})$                                                                                           |
| 29  | $\theta_{BR,TKV}$       | $\theta_{[BR], [TKV]} / (\gamma_{BR} \cdot k_{d,BR} \cdot \gamma_{br} / k_{d,br})$                                                            |
| 30  | $\theta_{BRK,br}$       | $\theta_{[BRK], [br]} / (\gamma_{BRK} / k_{d,BRK})$                                                                                           |
| 31  | $t$                     | $T / k_{d,br}$                                                                                                                                |
| 32  | $x$                     | $X / L$                                                                                                                                       |
| 33  | $x_{GRK}$               | $X_{Grk} / L$                                                                                                                                 |

Table S5. Parameter values used in the model

| No. | Parameter                                     | Value |
|-----|-----------------------------------------------|-------|
| 1   | $\mathcal{E}_{PNT}$                           | 1     |
| 2   | $\mathcal{E}_{TKV}$                           | 1     |
| 3   | $\mathcal{E}_{BRK}$                           | 1     |
| 4   | $\mathcal{E}_{BR}$                            | 10    |
| 5   | $\mathcal{E}_{GRK}$                           | 0.1   |
| 6   | $\mathcal{E}_{DPP}$                           | 0.1   |
| 7   | $\phi_{DPP}$                                  | 14    |
| 8   | $\phi_{GRK}$                                  | 2     |
| 9   | $f_{br,g.i.}$                                 | 0.1   |
| 10  | $\kappa_{d,DPP}$                              | 1     |
| 11  | $\theta_{S_{EGFR},PNT}$                       | 0.6   |
| 12  | $\theta_{S_{EGFR},br}$                        | 0.4   |
| 13  | $\theta_{S_{EGFR},BRK}$                       | 0.3   |
| 14  | $\theta_{PNT,br}$                             | 0.1   |
| 15  | $\theta_{BR,TKV}$                             | 0.4   |
| 16  | $\theta_{S_{DPP},BRK}$                        | 0.06  |
| 17  | $\theta_{S_{DPP},br}$                         | 0.02  |
| 18  | $\theta_{BRK,br}$                             | 0.05  |
| 19  | $x_{GRK}$                                     | 0.2   |
| 20  | $\alpha_{br} \cdot k_{d,br} / \gamma_{br}$    | 0.1   |
| 21  | $\alpha_{TKV} \cdot k_{d,TKV} / \gamma_{TKV}$ | 0.2   |
| 22  | $\alpha_{BRK} k_{d,BRK} / \gamma_{BRK}$       | 1     |

## Other Supporting Information Files

[SI Text](#)
